# Supplementary material for: Cells in the Polyaneuploid Cancer Cell State are Pro-Metastatic
Source: PubMed Central journal article supplement — bioRxiv. 2024 Jul 16:2024.07.12.603285. Preprint. [Version 1] doi: 10.1101/2024.07.12.603285 (PMC11275908; doi:10.1101/2024.07.12.603285), 2024-07-16
Supplement: NIHPP2024.07.12.603285V1-supplement-1.pdf [file NIHPP2024.07.12.603285V1-supplement-1.pdf]

**A. Time-Matched Subcutaneous Tumor: Blood CTCs**

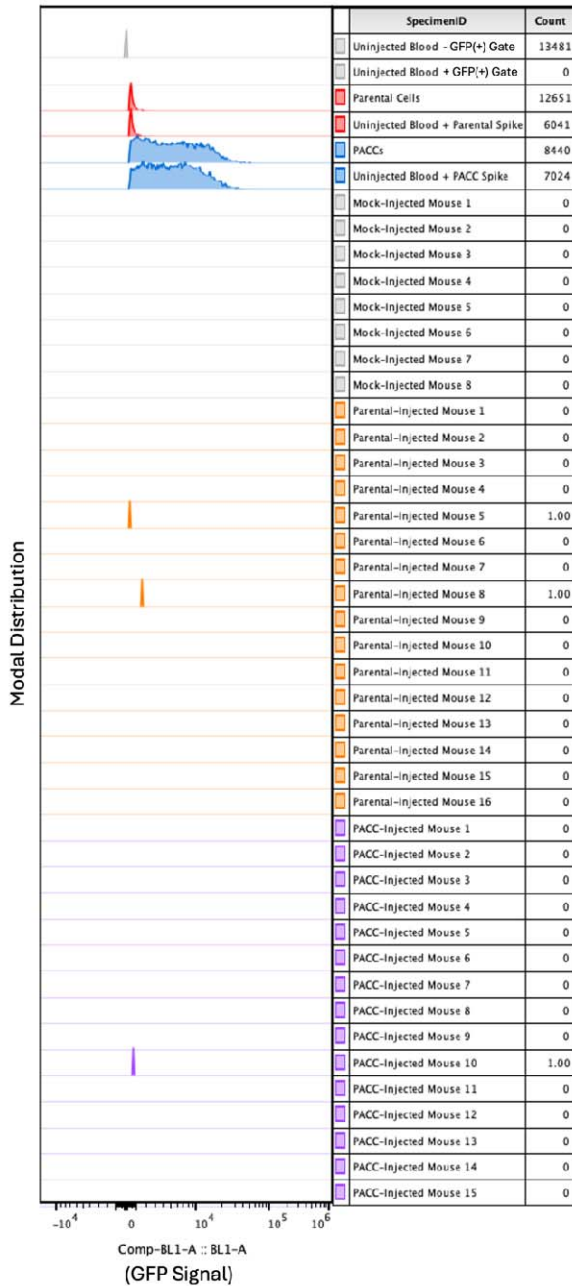

**B. Time-Matched Subcutaneous Tumor: Blood CTCs**

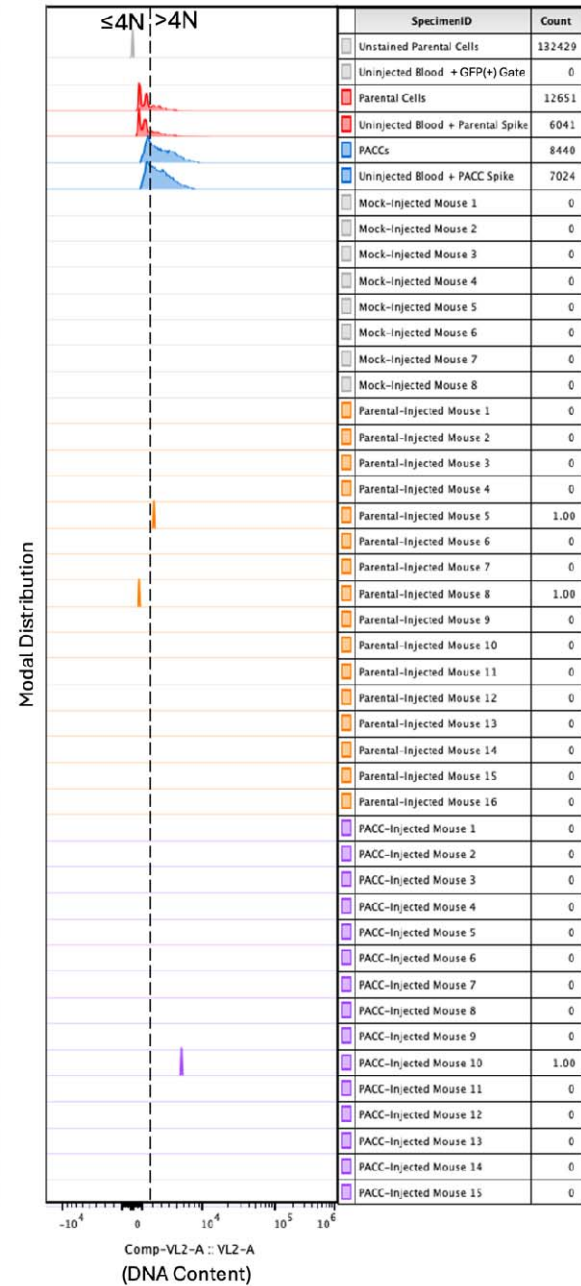

242 **Supplemental Figure S1:**

243 Time-matched, subcutaneous injection of PC3-GFP-Luc parental population vs.  
 244 PACC-enriched population: A) Raw cytometric data reporting GFP+ signal across all  
 245 blood samples. B) Raw cytometric data reporting DNA content of GFP+ cells across all  
 246 blood samples.

**A. Time-Matched Subcutaneous Tumor: Bone DTCs**

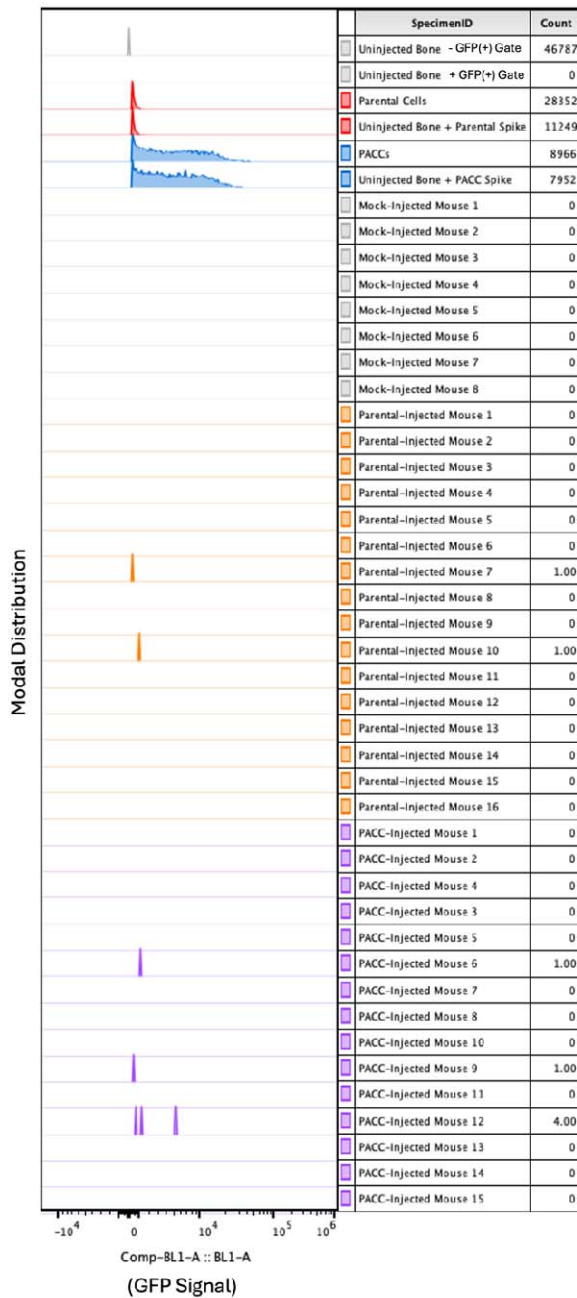

**B. Time-Matched Subcutaneous Tumor: Bone DTCs**

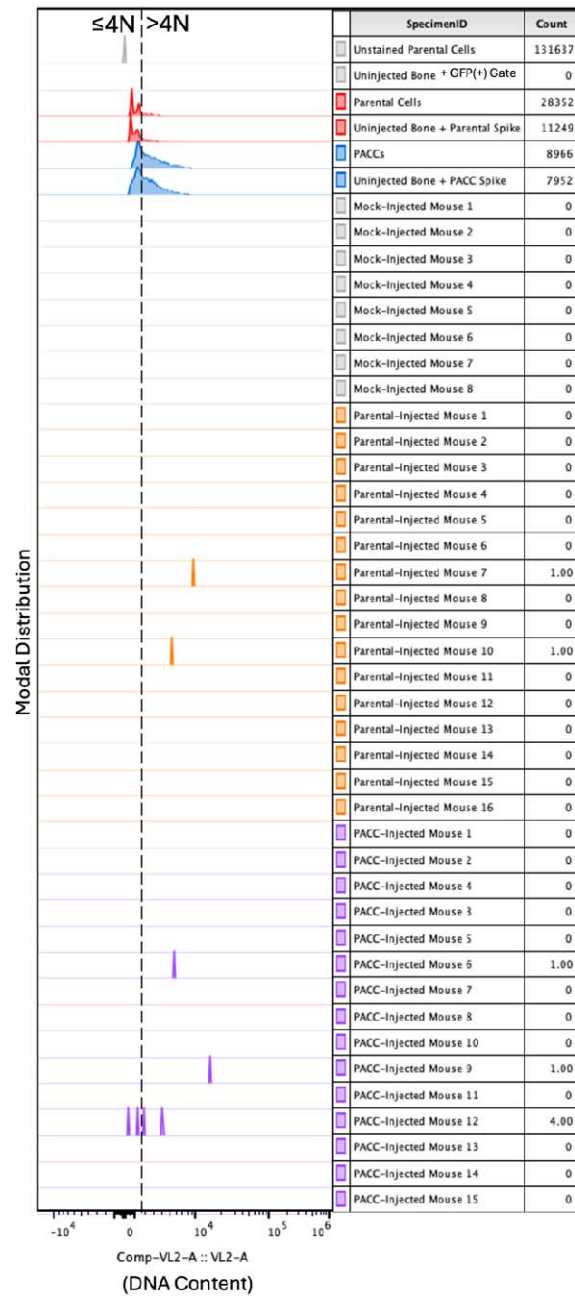

247 **Supplemental Figure S2:**

248 Time-matched, subcutaneous injection of PC3-GFP-Luc parental population vs.  
 249 PACC-enriched population: A) Raw cytometric data reporting GFP+ signal across all  
 250 bone marrow samples. B) Raw cytometric data reporting DNA content of GFP+ cells  
 251 across all bone marrow samples.

252  
 253

**A. Size-Matched Subcutaneous Tumor: Blood CTCs**

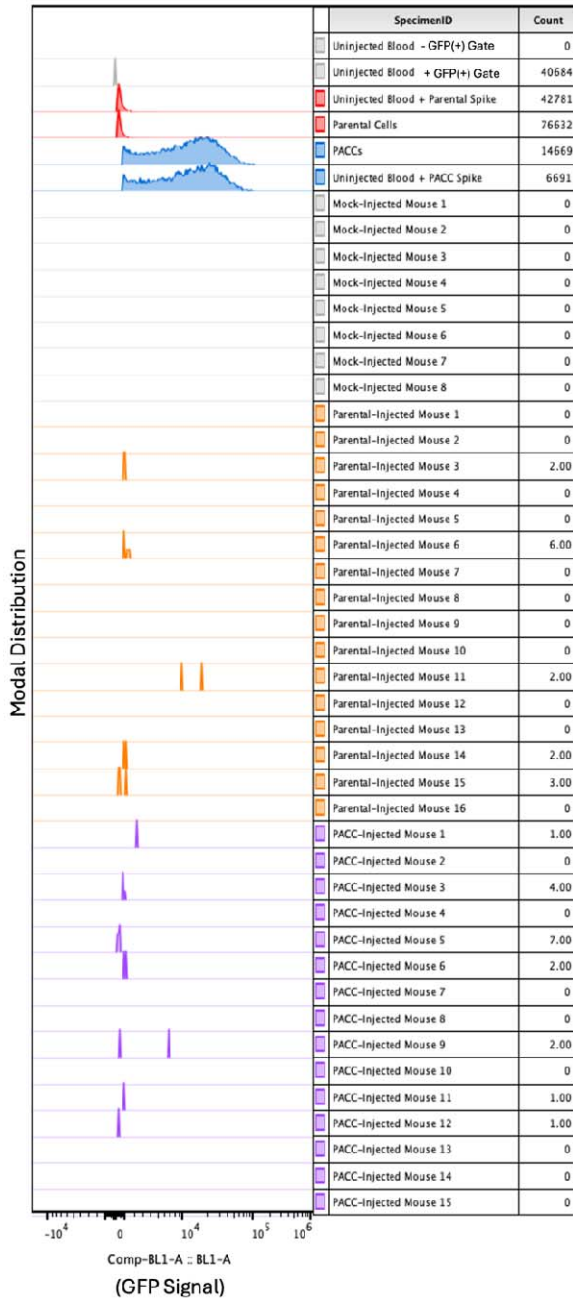

**B. Size-Matched Subcutaneous Tumor: Blood CTCs**

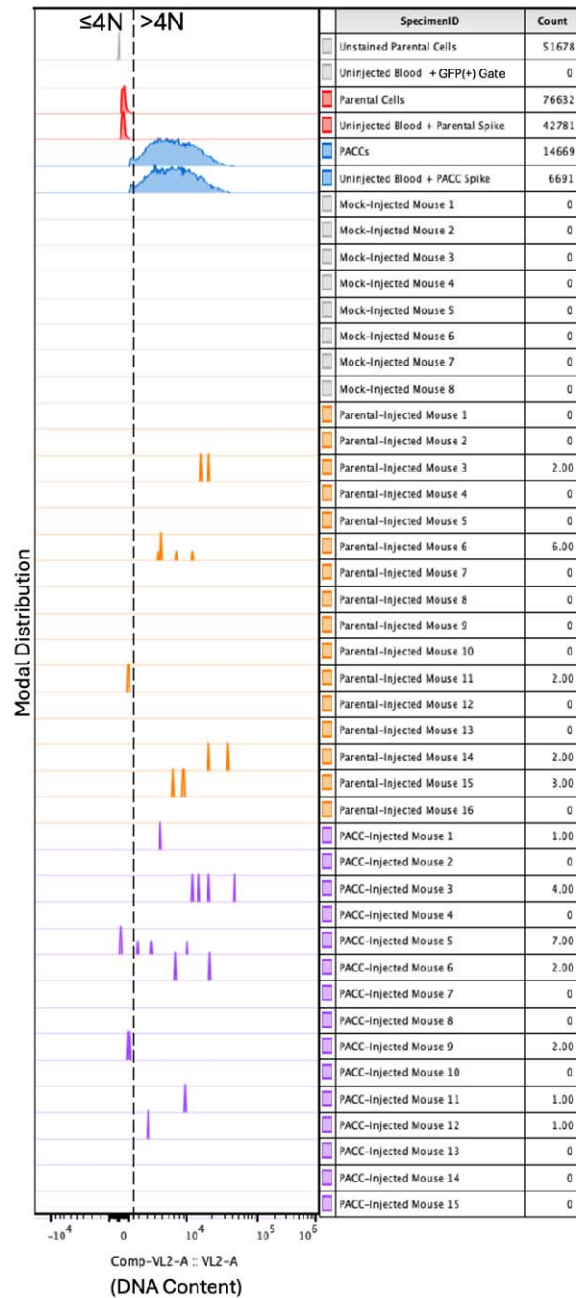

293 **Supplemental Figure S3:**

294 Size-matched, subcutaneous injection of PC3-GFP-Luc parental population vs.  
 295 PACC-enriched population: A) Raw cytometric data reporting GFP+ signal across all  
 296 blood samples. B) Raw cytometric data reporting DNA content of GFP+ cells across all  
 297 blood samples.

**A. Size-Matched Subcutaneous Tumor: Bone DTCs**

**B. Size-Matched Subcutaneous Tumor: Bone DTCs**

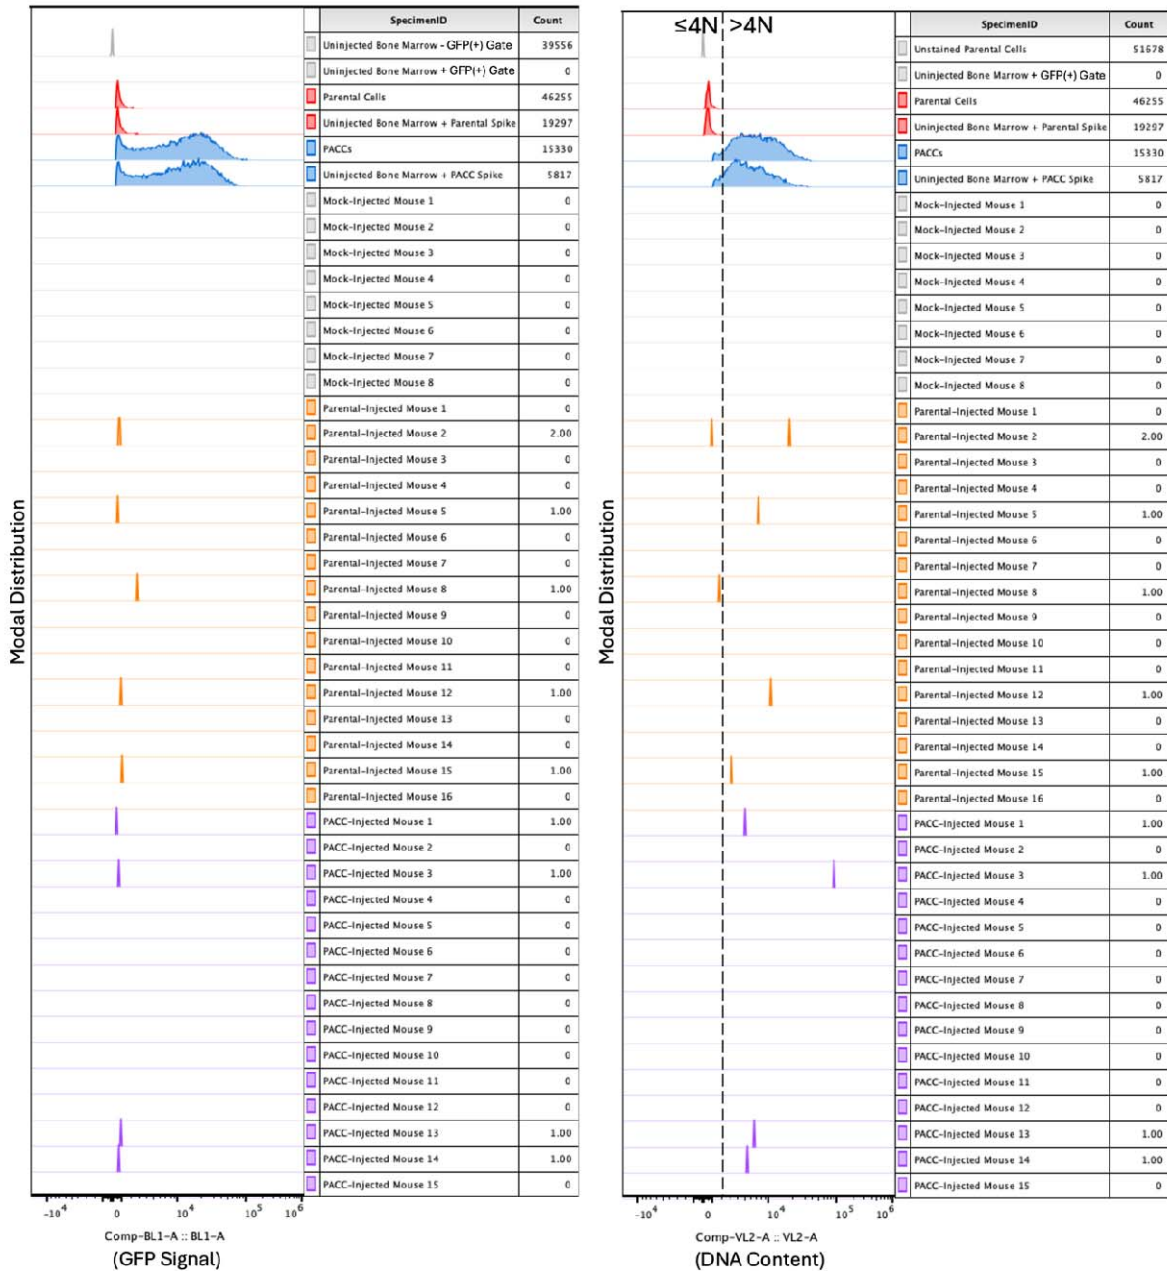

298 **Supplemental Figure S4:**

299 Size-matched, subcutaneous injection of PC3-GFP-Luc parental population vs.  
 300 PACC-enriched population: A) Raw cytometric data reporting GFP+ signal across all  
 301 bone marrow samples. B) Raw cytometric data reporting DNA content of GFP+ cells  
 302 across all bone marrow samples.  
 303

**A. Caudal Artery Injections: Bone Marrow DTCs**

**B. Caudal Artery Injections: Bone Marrow DTCs**

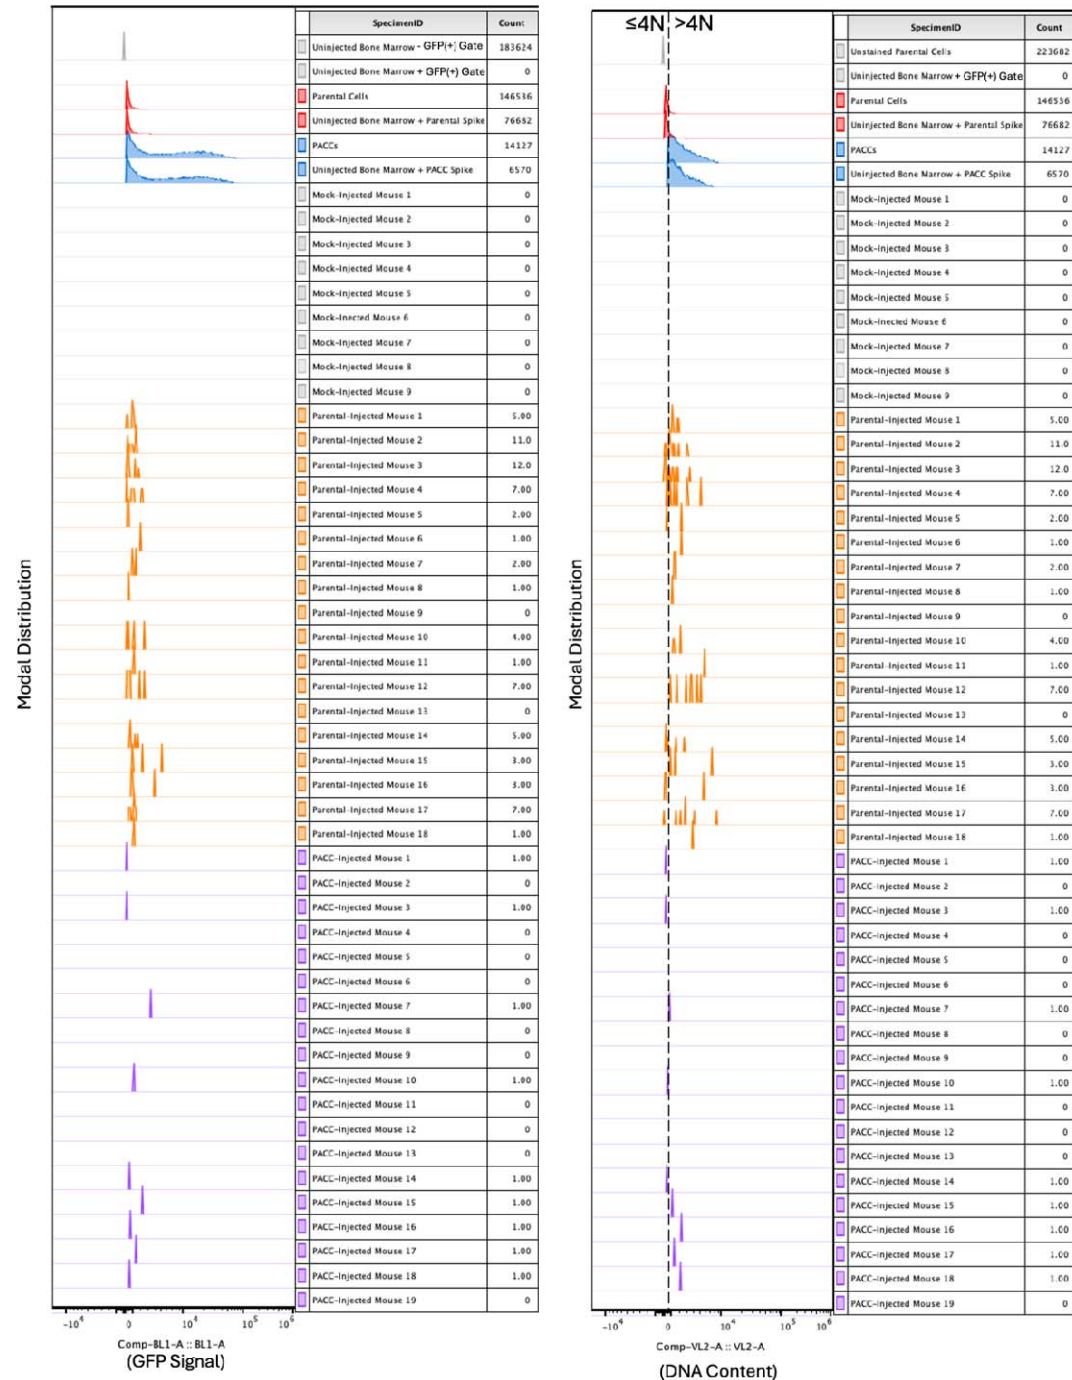

314 **Supplemental Figure S5:**

315 Caudal Artery injection of PC3-GFP-Luc parental population vs. PACC-enriched  
 316 population: A) Raw cytometric data reporting GFP+ signal across all bone marrow  
 317 samples. B) Raw cytometric data reporting DNA content of GFP+ cells across all bone  
 318 marrow samples.

**A. Caudal Artery Injections: Lung DTCs**

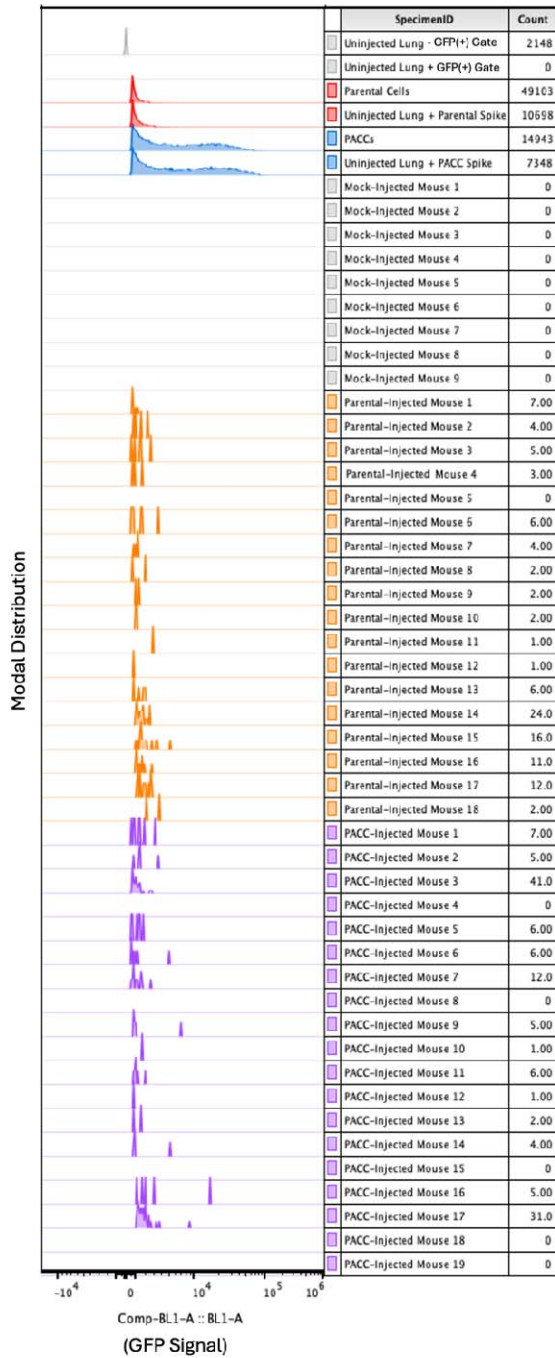

**B. Caudal Artery Injections: Lung DTCs**

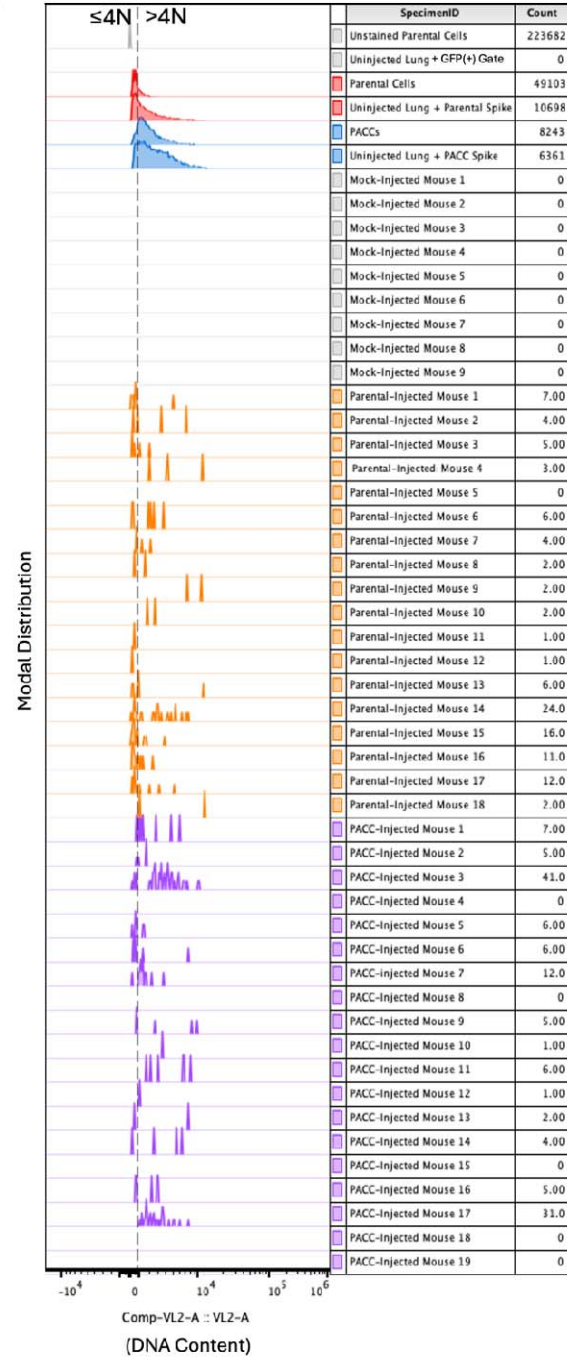

320 **Supplemental Figure S6:**

321 Caudal Artery injection of PC3-GFP-Luc parental population vs. PACC-enriched  
 322 population: A) Raw cytometric data reporting GFP+ signal across all lung tissue  
 323 samples. B) Raw cytometric data reporting DNA content of GFP+ cells across all lung  
 324 tissue samples.

347 **Supplemental Figure S7:**

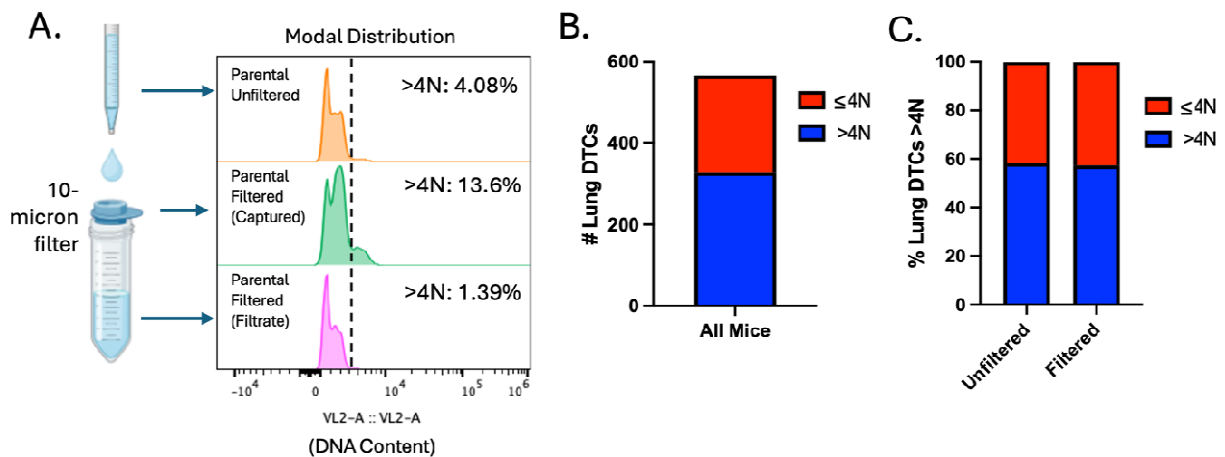

348 Tail Vein injection of PC3-GFP-Luc parental population vs. PACC-depleted  
349 parental population: A) Flow-cytometric ploidy analysis of injected cells per injection  
350 group. B) Proportion of lung DTCs with >4N DNA content across all experimental mice.  
351 C) Comparative proportions of lung DTCs with >4N DNA content between two injection  
352 groups.

353

354

367

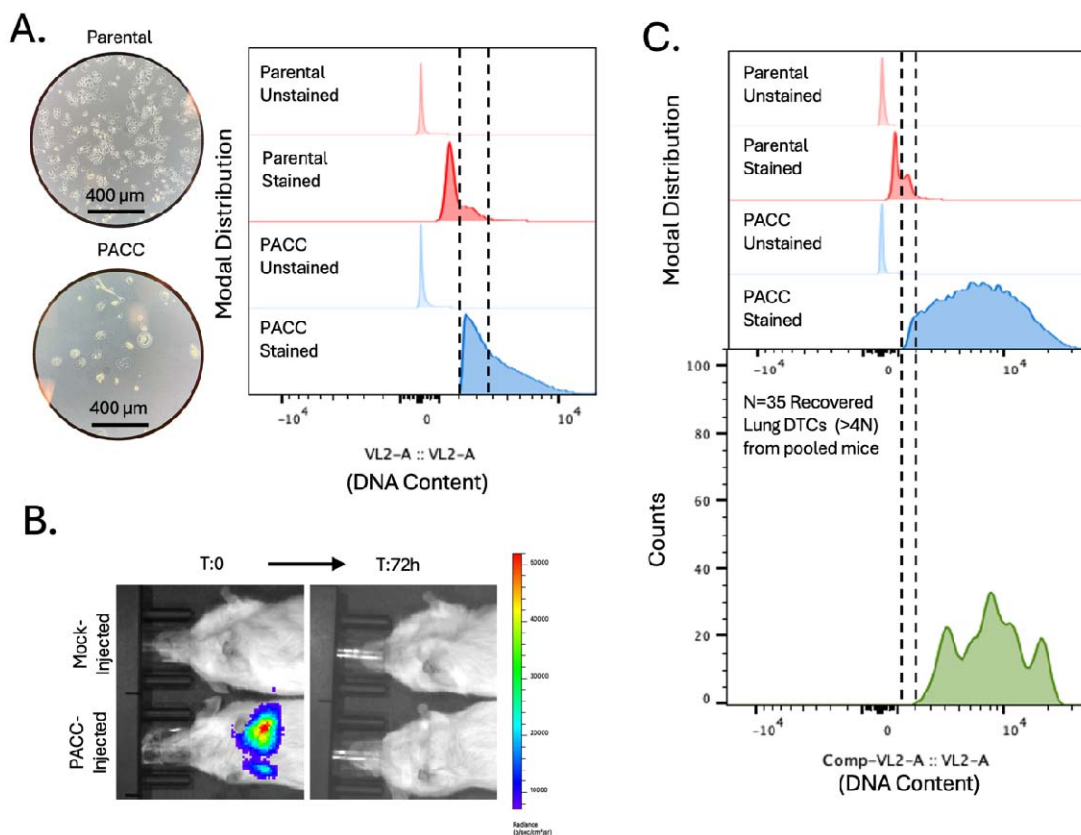

368 **Supplemental Figure S8:**

369 Tail Vein injection of PC3-GFP-Luc parental population vs. PACC-enriched  
370 population: A) Light microscopy photos and flow-cytometric ploidy analysis of injected  
371 cells per injection group. B) Representative BLI images capturing the cellular distribution  
372 and signal intensity immediately following tail vein injection and 3 days following tail vein  
373 injection. C) Raw cytometric data reporting the presence of >4N Lung DTCs in a pooled  
374 sample 21 days following PACC injection.



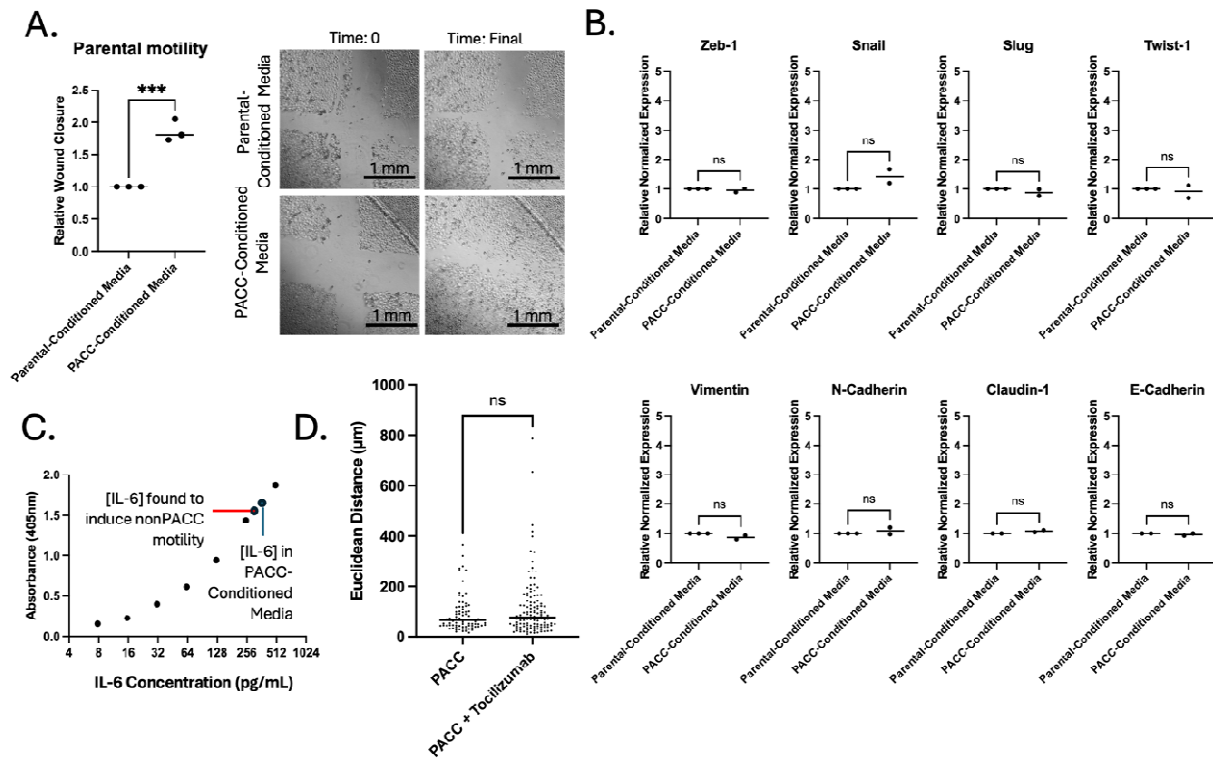

584 **Supplemental Figure S9:**

585 PACCs have a pro-metastatic secretory profile: A) Wound-healing assay to

586 measure the differential motility of a PC3-Luc population exposed to parental-

587 conditioned media vs. PACC-conditioned media, where each reported biological

588 replicate is an average of two technical replicates. B) RNA expression of a panel of

589 EMT markers by RTqPCR in a PC3-Luc parental population exposed to parental-

590 conditioned media vs. PACC-conditioned media, where each biological replicate reported

591 is an average of three technical replicates. C) Elisa assay to measure the concentration

592 of IL6 in PACC conditioned media. D) Single cell tracking to measure the effects of

593 addition of Tocilizumab on the motility of a PACCs.

594

595

596

597

598

599

600

601

602

603

604

605

606
